# Supplementary material
Source: MDPI journal article supplement (https://www.mdpi.com/2071-1050/15/18/13897)
Supplement: s1 [file s1]

# Enhancing a Real-Time Flash Flood Predictive Accuracy Approach for the Development of Early Warning Systems: Hydrological Ensemble Hindcasts and Parameterizations

Joško Trošelj<sup>1,2,\*</sup>, Han Soo Lee<sup>1,3</sup> and Lena Hobohm<sup>4</sup>

**Citation:** Trošelj, J.; Lee, H.S.; Hobohm, L. Enhancing a Real-Time Flash Flood Predictive Accuracy Approach for the Development of Early Warning Systems: Hydrological Ensemble Hindcasts and Parameterizations. *Sustainability* **2023**, *15*, x. <https://doi.org/10.3390/xxxxx>

Academic Editor: Khalil Ur Rahman, Amro Mohamed Elfeki, Jarbou A. Bahrawi, Muhammad Shahid and Shuai Chen

Received: 21 July 2023

Revised: 5 September 2023

Accepted: 11 September 2023

Published: 14 September 2023

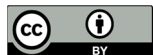

**Copyright:** © 2023 by the authors. Submitted for possible open access publication under the terms and conditions of the Creative Commons Attribution (CC BY) license (<https://creativecommons.org/licenses/by/4.0/>).

<sup>1</sup> Transdisciplinary Science and Engineering Program, Graduate School of Advance Science and Engineering, Hiroshima University, 1-5-1 Kagamiyama, Higashi-Hiroshima 738-8529, Japan; leehs@hiroshima-u.ac.jp

<sup>2</sup> Center for Climate Change Adaptation, National Institute for Environmental Studies (NIES), 16-2 Onogawa, Tsukuba 305-8506, Japan

<sup>3</sup> Center for the Planetary Health and Innovation Science (PHIS), The IDEC Institute, Hiroshima University, Hiroshima 739-8529, Japan

<sup>4</sup> Institute for Environmental Systems Sciences, University of Graz, Universitätsplatz 3, 8010 Graz, Austria; lena.hobohm@gmail.com

\* Correspondence: troselj.josko.27z@kyoto-u.jp or josko.troselj@gmail.com

## Supplementary Table S1

**Supplementary Table S1.** Initial set of parameters and minimal and maximal searching ranges for the SCE-UA parameter

| Optimized parameter/Condition                                                               | Initial | Minimum | Maximum |
|---------------------------------------------------------------------------------------------|---------|---------|---------|
| Soil roughness coefficient $N_{slo} [m^{-1/3}s]$                                            | 0.6     | 0.1     | 1       |
| River roughness coefficient $N_{riv} [m^{-1/3}s]$                                           | 0.03    | 0.01    | 0.1     |
| Effective porosity of non-capillary subsurface layer $\theta_a [ / ]$                       | 0.4     | 0.1     | 0.7     |
| Saturated hydraulic conductivity $k_a [ms^{-1}]$                                            | 0.05    | 0.005   | 0.5     |
| Canopy interception and evaporation factor $F1 [ / ]$                                       | 1       | 0.6     | 1       |
| Effective porosity of capillary subsurface layer $\theta_m [ / ]$                           | 0.4     | 0.1     | 0.7     |
| Degree of reduction of permeability due to the volumetric water rate decrease $\beta [ / ]$ | 4       | 2       | 10      |

calibrations. The first five parameters are used in 5-CPM.
