# Supplementary material
Source: MDPI journal article supplement (https://www.mdpi.com/2071-1050/15/18/13897)
Supplement: s1 [file s1]

# Enhancing a Real-Time Flash Flood Predictive Accuracy Approach for the Development of Early Warning Systems: Hydrological Ensemble Hindcasts and Parameterizations

Joško Trošelj <sup>1,2,\*</sup>, Han Soo Lee <sup>1,3</sup> and Lena Hobohm <sup>4</sup>

<sup>1</sup> Transdisciplinary Science and Engineering Program, Graduate School of Advance Science and Engineering, Hiroshima University, 1-5-1 Kagamiyama, Higashi-Hiroshima 738-8529, Japan; leehs@hiroshima-u.ac.jp

<sup>2</sup> Center for Climate Change Adaptation, National Institute for Environmental Studies (NIES), 16-2 Onogawa, Tsukuba 305-8506, Japan

<sup>3</sup> Center for the Planetary Health and Innovation Science (PHIS), The IDEC Institute, Hiroshima University, Hiroshima 739-8529, Japan

<sup>4</sup> Institute for Environmental Systems Sciences, University of Graz, Universitätsplatz 3, 8010 Graz, Austria; lena.hobohm@gmail.com

\* Correspondence: trosej.josko.27z@kyoto-u.jp or josko.troelj@gmail.com

## Supplementary Material 2

**Supplementary Figure S1** shows the Saba River ensemble average cross-validation discharge results for 6 historical events selected for calibration at Shimbashi station, located 8 km upstream from the river mouth, using the 7-CPM and 5-CPM parameter sets and rainfall data input from the 2010, 2016, 2005-9, 2005-7, 2011 and 2009 events compared with observed data.

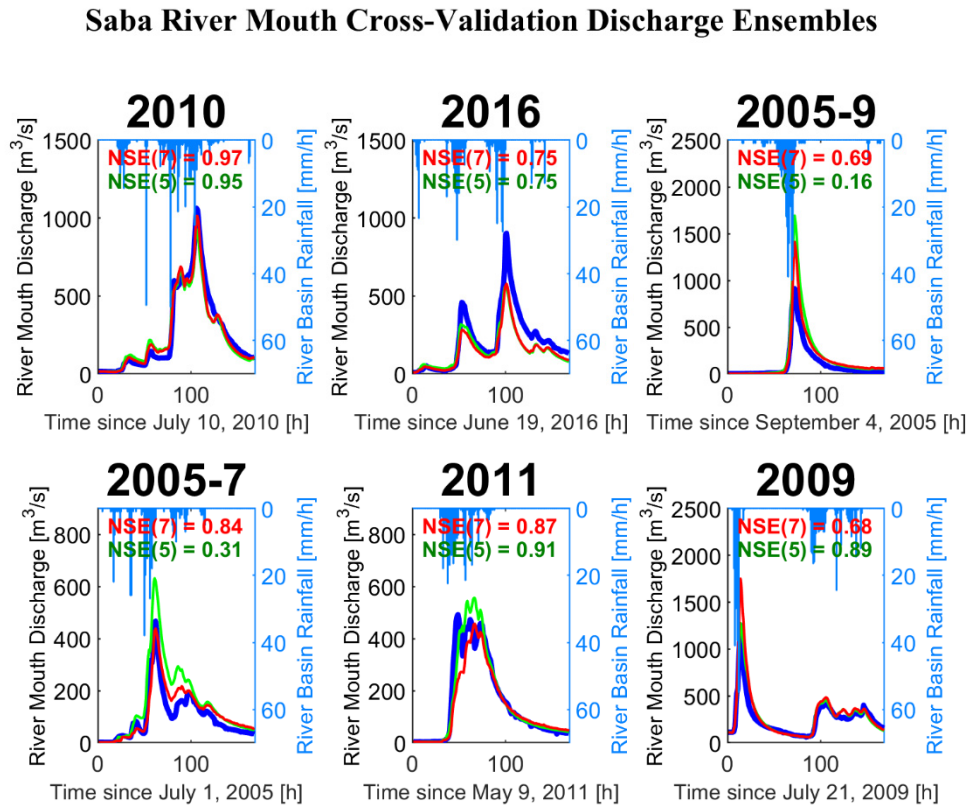

**Supplementary Figure S1.** Saba River ensemble average cross-validation discharge results for 6 historical events selected for calibration when using the 7-CPM (red) and 5-CPM (green) compared with the observed river discharges (blue—60) at a site 8 km upstream from the river mouth.

**Supplementary Figure S2** shows the Oze River ensemble average cross-validation discharge results for 6 historical events selected for calibration at Shimogahara station, located just upstream from Yasaka Lake, using the 7-CPM and 5-CPM sets with the HRE18 rainfall data and ensemble average validation of all 6 calibrated parameter sets with the 7-CPM and 5-CPM sets and rainfall data input from the 2010, 2016, 2005, 2006, 2004 and 2003 events compared with observed data. The Oze River has a flood control dam system at Yasaka Lake located less than 20 km upstream from the river mouth.

### Oze River Mouth Cross-Validation Discharge Ensembles

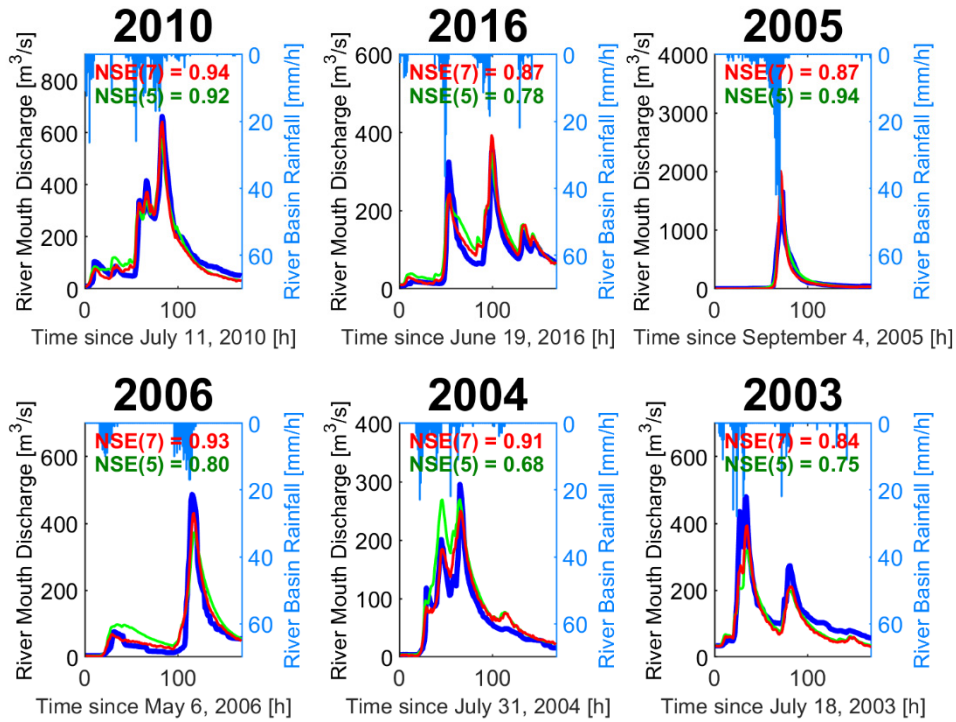

**Supplementary Figure S2.** Oze River ensemble average cross-validation discharge results for 6 historical events selected for calibration when using the 7-CPM (red) and 5-CPM (green) compared with the observed river discharges (blue—60) at a site located just upstream from Yasaka Lake.

**Supplementary Figure S3** shows the Ashida River ensemble average cross-validation discharge results for 6 historical events selected for calibration at Yamate station, located 9.53 km upstream from the river mouth, using the 7-CPM and 5-CPM parameter sets and rainfall data input from the 2017, 2010, 2013-9, 2013-6, 2016 and 2005 events.

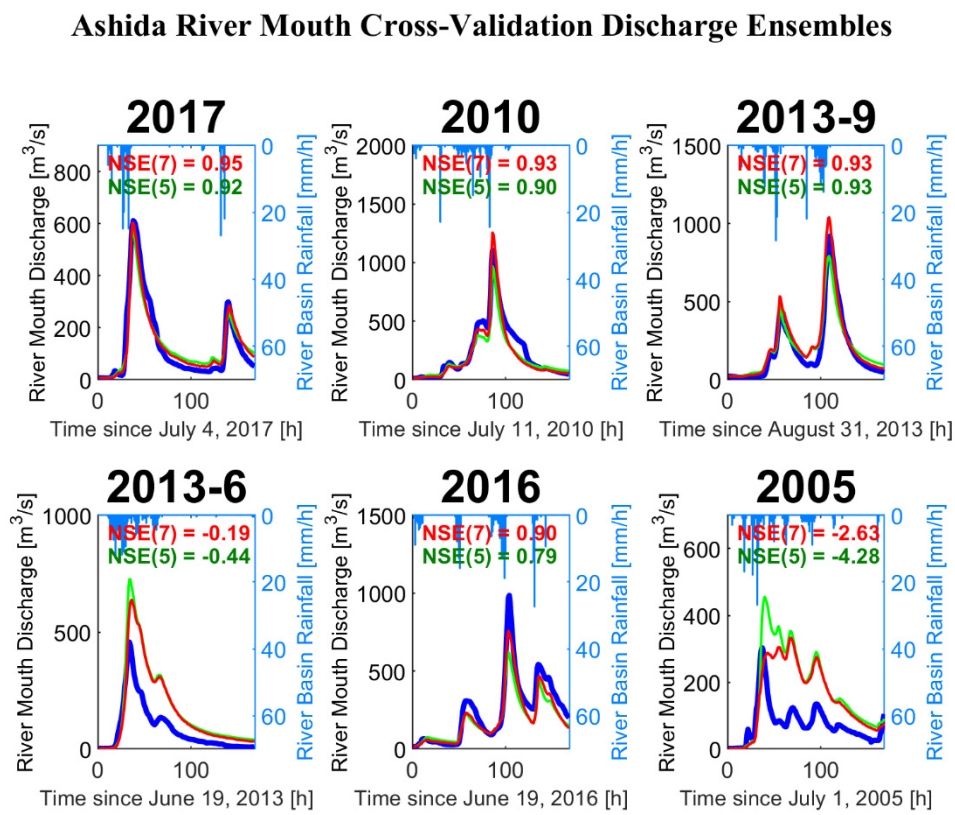

**Supplementary Figure S3.** Ashida River ensemble average cross-validation discharge results for 6 historical events selected for calibration when using the 7-CPM (red) and 5-CPM (green) compared with the observed river discharges (blue—60) at a site 9.53 km upstream from the river mouth.

**Supplementary Figure S4** shows the Asahi River ensemble average cross-validation discharge results for 6 historical events selected for calibration at Makiyama station, located 20.4 km upstream from the river mouth, using the 7-CPM and 5-CPM parameter sets and rainfall data input from the 2006, 2013, 2011, 2018-9, 2004 and 2018-10 events.

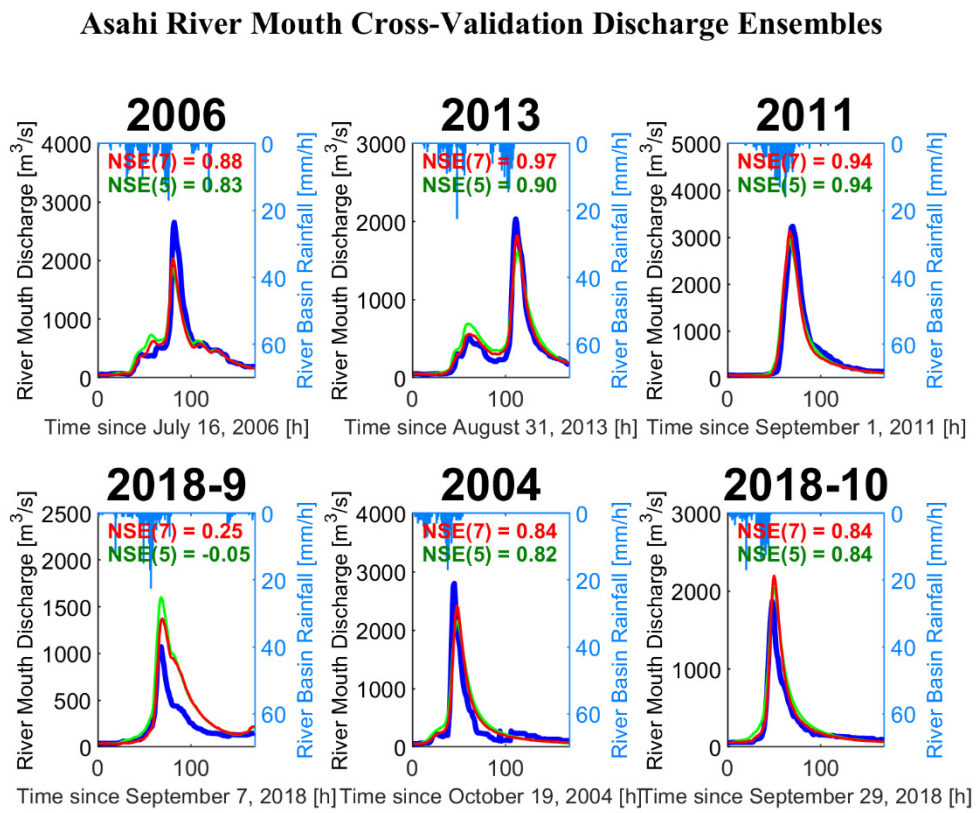

**Supplementary Figure S4.** Asahi River ensemble average cross-validation discharge results for 6 historical events selected for calibration when using the 7-CPM (red) and 5-CPM (green) compared with the observed river discharges (blue—60) at a site 20.4 km upstream from the river mouth.

**Supplementary Figure S5** shows the Yoshii River ensemble average cross-validation discharge results for 6 historical events selected for calibration at Miyasu station, located 14.05 km upstream from the river mouth, using the 7-CPM and 5-CPM parameter sets and rainfall data input from the 2004-9, 2011, 2013, 2009, 2006 and 2004-10 events.

### Yoshii River Mouth Cross-Validation Discharge Ensembles

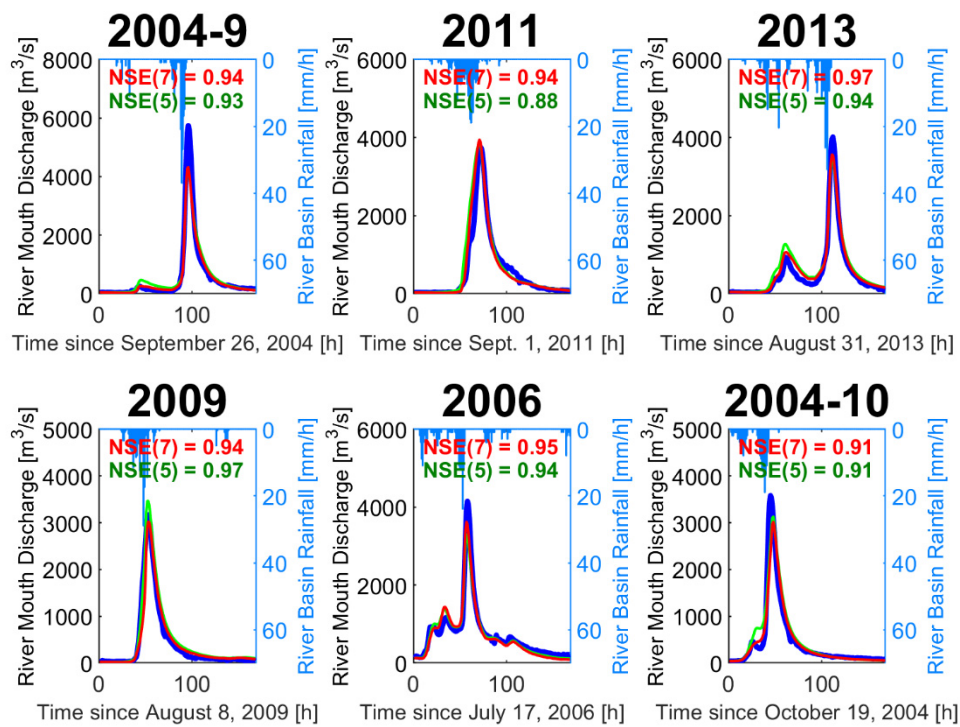

**Supplementary Figure S5.** Yoshii River ensemble average cross-validation discharge results for 6 historical events selected for calibration when using the 7-CPM (red) and 5-CPM (green) compared with the observed river discharges (blue—60) at a site 14.05 km upstream from the river mouth.
